# Supplementary material
Source: PubMed Central journal article supplement (PMC3807435)
Supplement: JB.00836-13_zjb999092844so1.pdf [file JB.00836-13_zjb999092844so1.pdf]

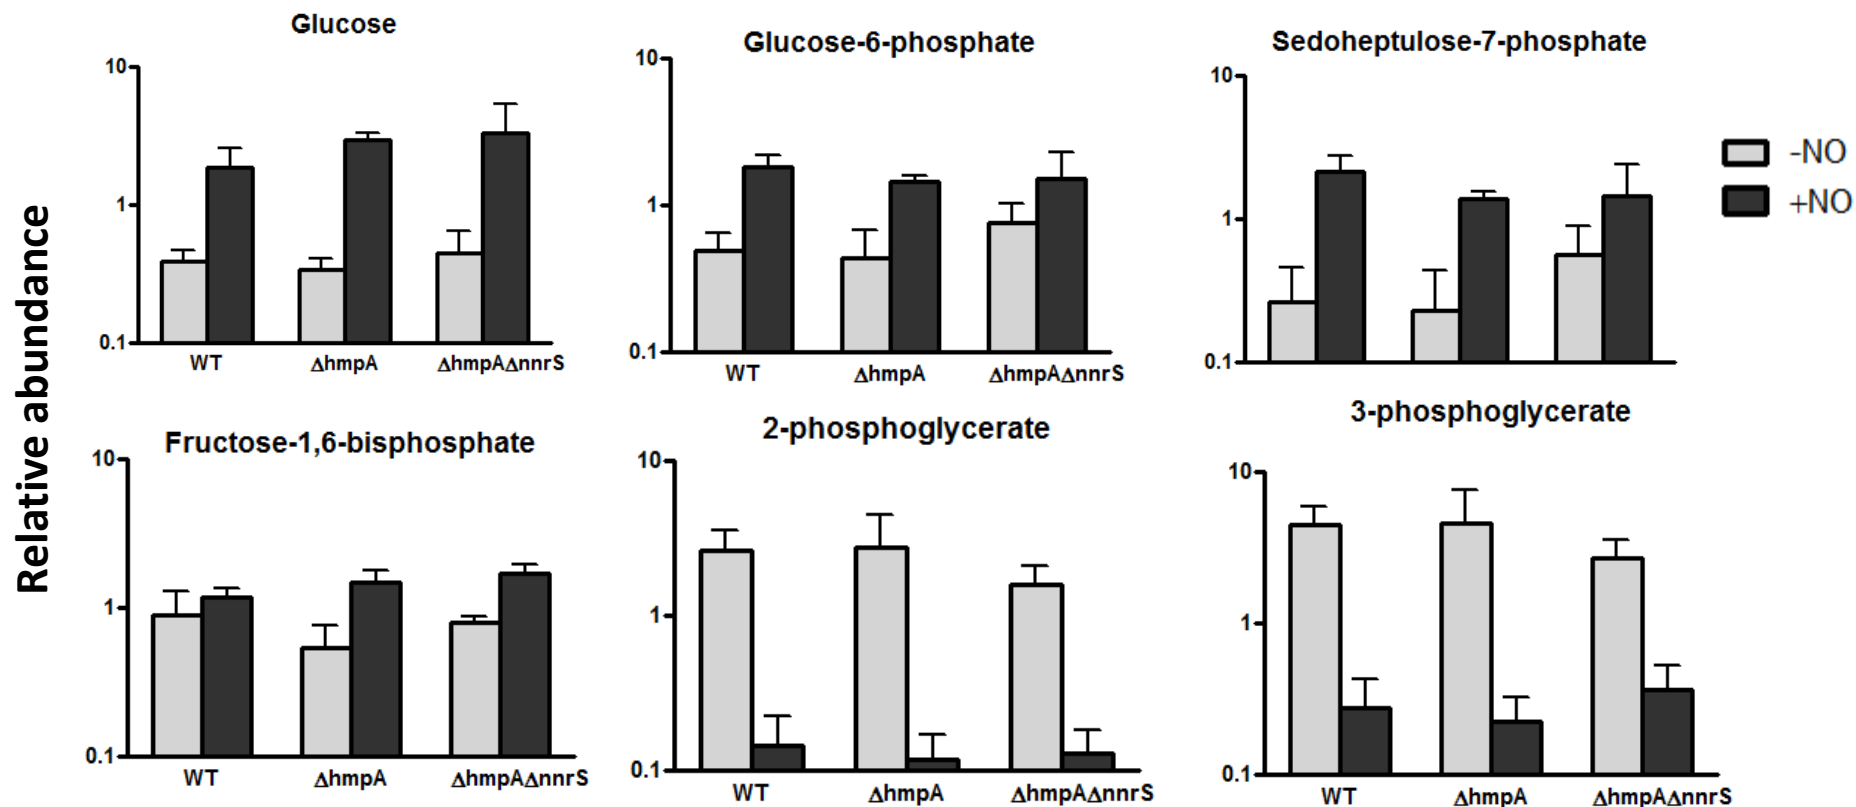

**Fig. S1. Nitric oxide inhibits glycolysis.** Relative concentrations of glycolytic intermediates in the three strains from the metabolomic study in the presence (+NO) or absence (-NO) of DETA-NONOate. Error bars represent standard deviation. Statistical significance was determined by two-way ANOVA, and for all metabolites, there was a significant effect of NO treatment on the variance across all samples ( $P < 0.001$ ).

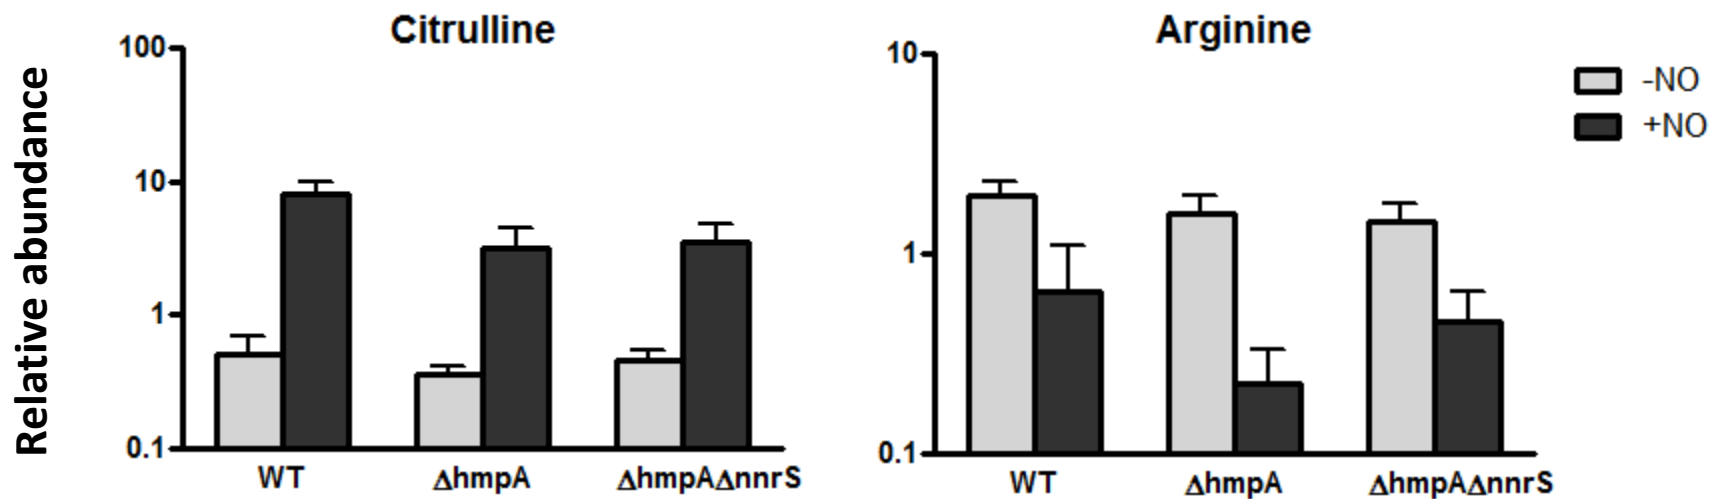

**Fig. S2. Nitric oxide inhibits arginine synthesis.** Relative concentrations of arginine synthesis intermediates in the three strains from the metabolomic study in the presence (+NO) or absence (-NO) of DETA-NONOate. Error bars represent standard deviation. Statistical significance was determined by two-way ANOVA, and for all metabolites, there was a statistically significant effect of NO treatment on the variance across all samples ( $P < 0.001$ ).

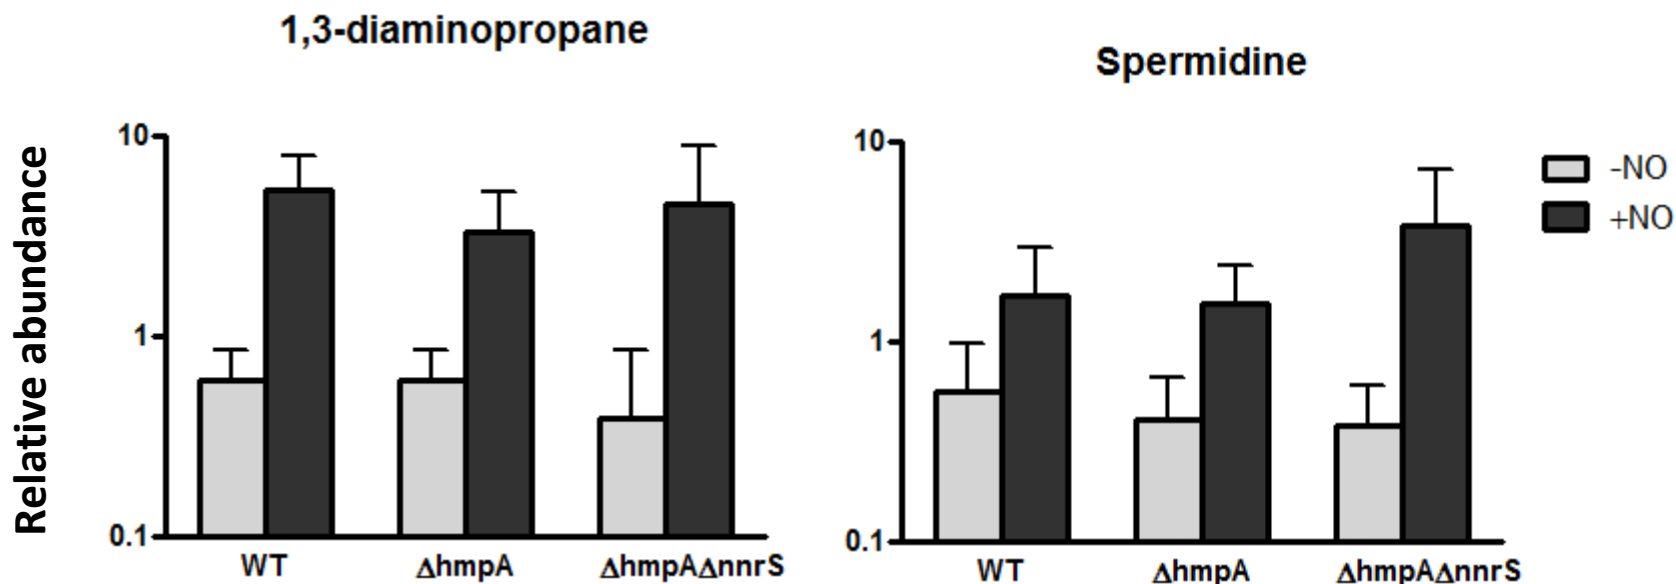

**Fig. S3. Nitric oxide causes an increase in polyamine synthesis.** Relative concentrations of polyamines in the three strains from the metabolomic study in the presence (+NO) or absence (-NO) of DETA-NONOate. Error bars represent standard deviation. Statistical significance was determined by two-way ANOVA, and for all metabolites, there was a statistically significant effect of NO treatment on the variance across all samples ( $P < 0.001$ ).

Relative abundance

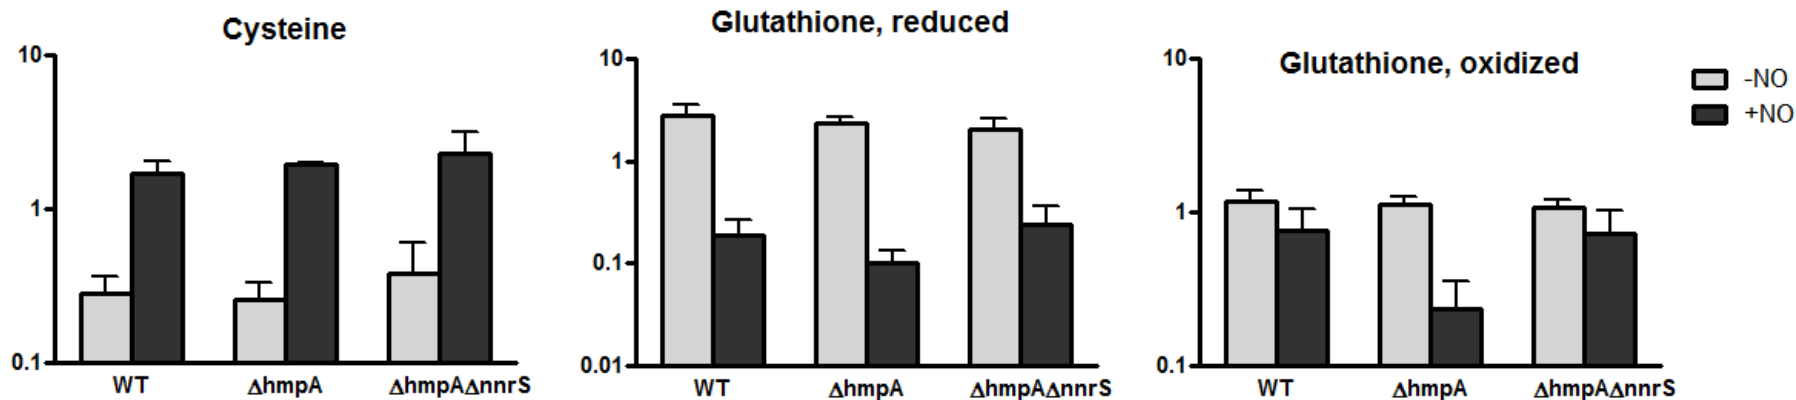

**Fig. S4. Nitric oxide inhibits glutathione synthesis.** Relative concentrations of glutathione and cysteine in the three strains from the metabolomic study in the presence (+NO) or absence (-NO) of DETA-NONOate. Error bars represent standard deviation. Statistical significance was determined by two-way ANOVA, and for all metabolites, there was a statistically significant effect of NO treatment on the variance across all samples ( $P < 0.001$ ).

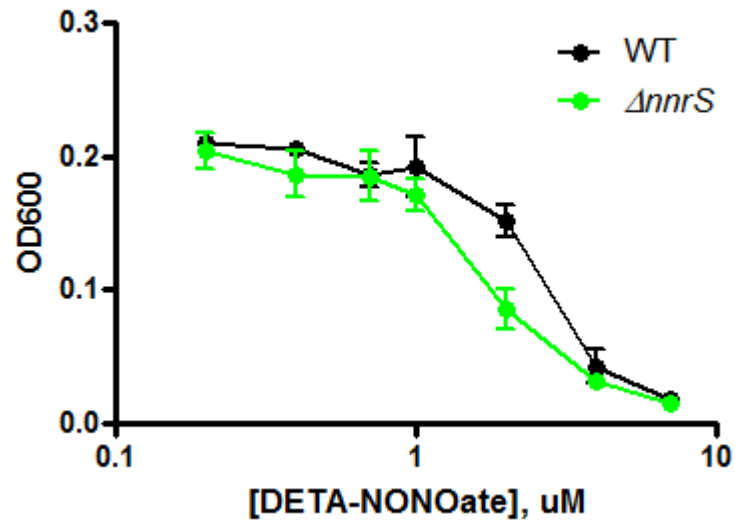

**Fig. S5. NnrS is important for growth under nitrosative stress during anaerobic respiration.** *V. cholerae* wildtype and  $\Delta nnrS$  strains were inoculated into minimal media containing 0.2% (w/v) glycerol and 40 mM fumarate and placed in an anaerobic chamber. Growth of wildtype and  $\Delta nnrS$  strains was monitored in the presence of increasing concentrations of DETA-NONOate. This graph represents the OD600 at 40 hours of growth.
